# Supplementary material for: Associations between Short-Term Air Pollution Exposure and the Peripheral Leukocyte Distribution in the Adult Male Population in Beijing, China
Source: MDPI journal article supplement (doi:10.3390/ijerph20064695), 2023-03-07

Figure S1. Time series analysis of the average daily concentration of air pollutants

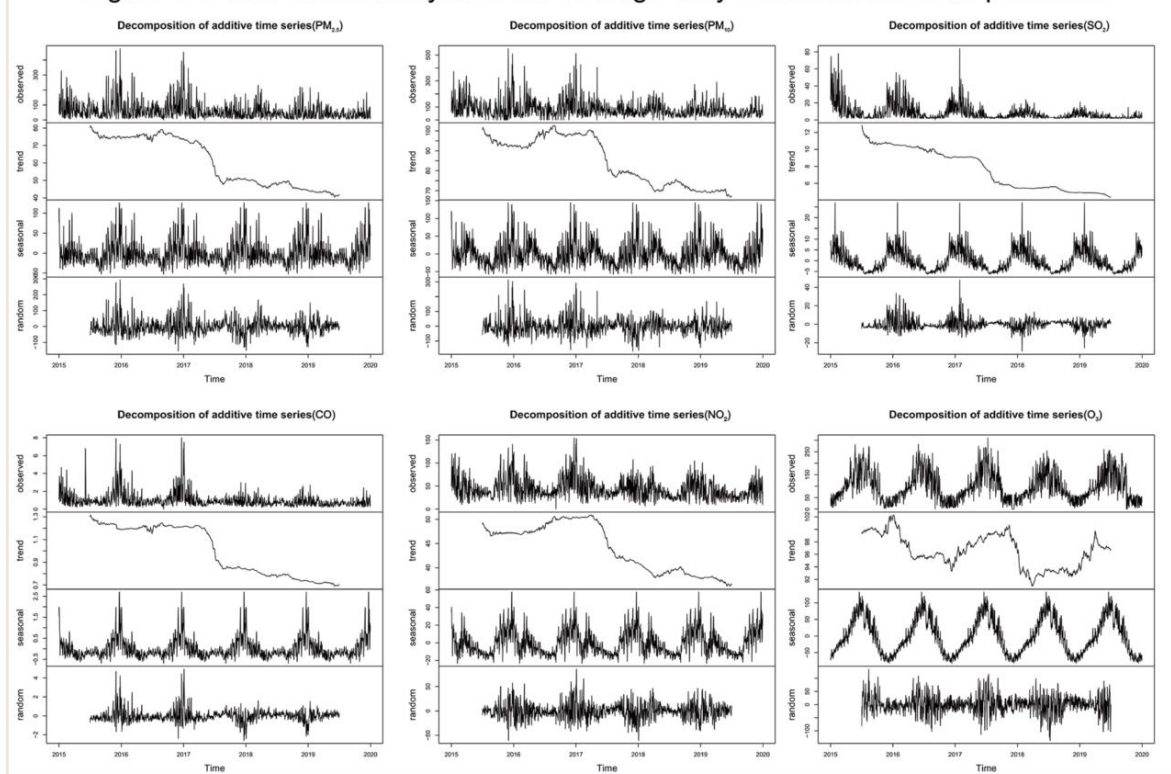

Figure S2. Spearman correlation analysis between the meteorological index and air pollutants

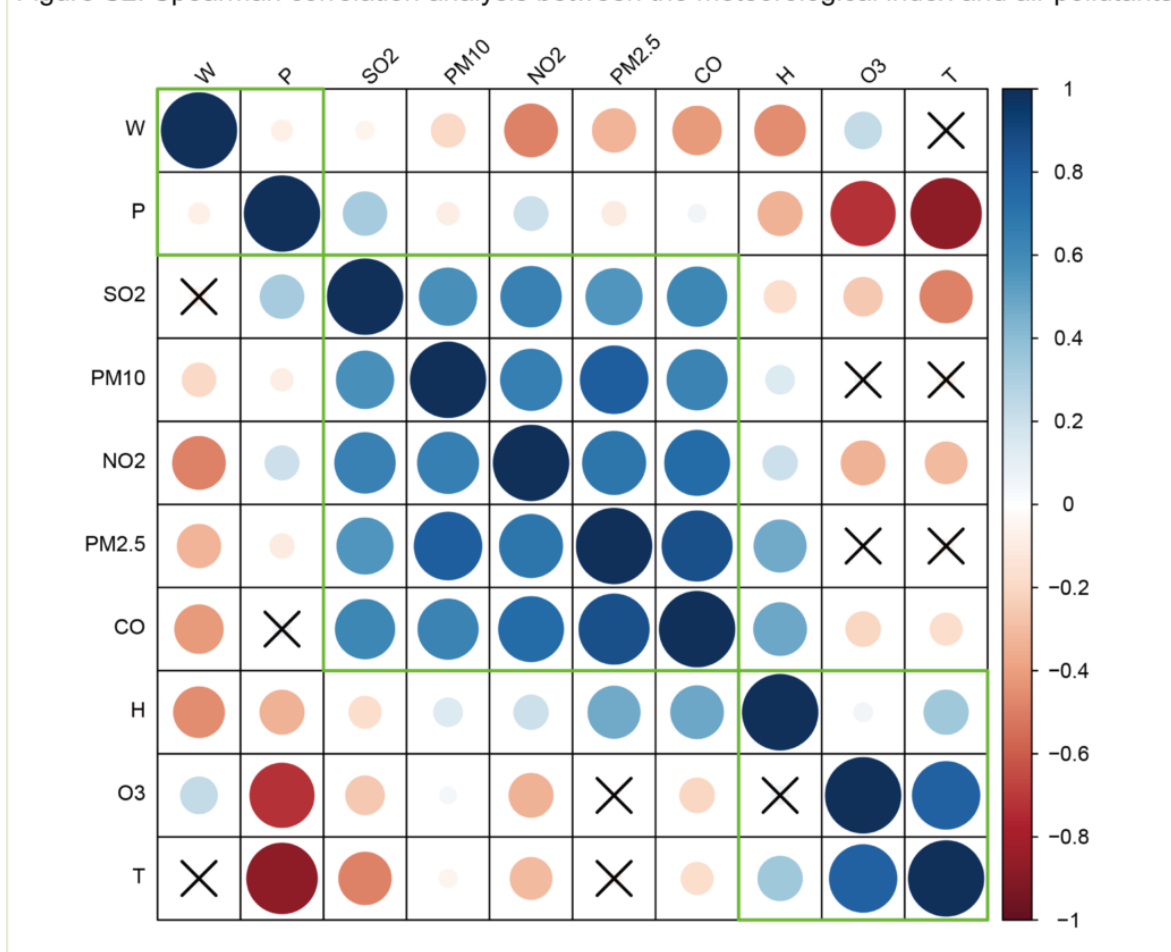

Supplement: s1 [file s1]
